# Supplementary material for: Liver Tumor Markers, HALP Score, and NLR: Simple, Cost-Effective, Easily Accessible Indexes for Predicting Prognosis in ICC Patients after Surgery
Source: MDPI journal article supplement (doi:10.3390/jpm12122041), 2022-12-09
Supplement: s1 [file s1]

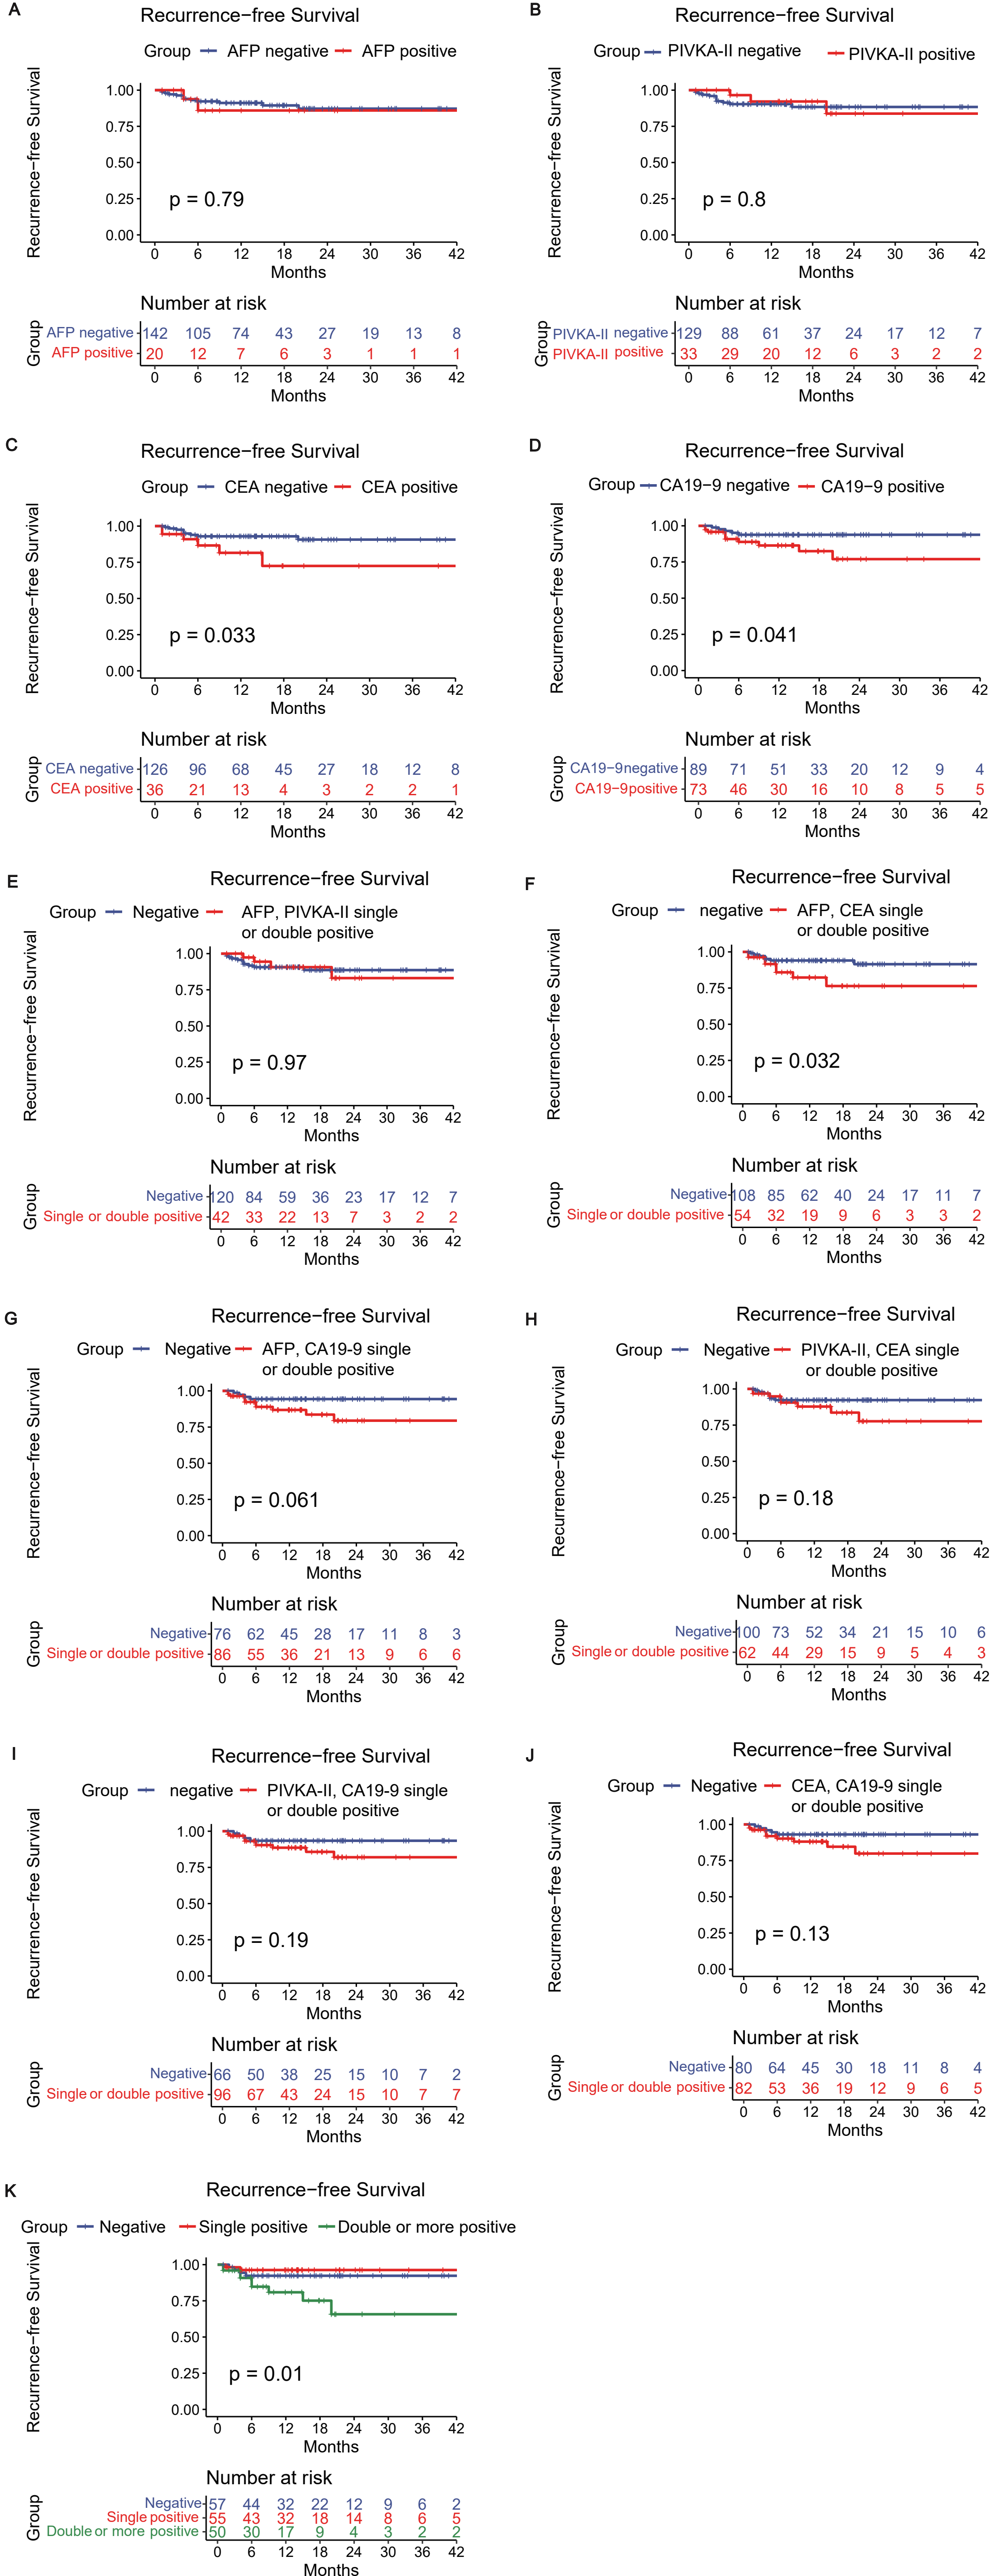

**Figure S3.** Distant metastasis recurrence-free survival curves of grouped intrahepatic cholangio-carcinoma patients based on the (A) AFP, (B) PIVKA-II, (C) CEA, (D) CA19-9, (E) AFP+PIVKA-II, (F) AFP+CEA, (G) AFP+CA19-9, (H) PIVKA-II+CEA, (I) PIVKA-II+CA19-9, (J) CEA+CA19-9, (K) positive numbers of liver tumor marker.
