# Supplementary material for: Liver Tumor Markers, HALP Score, and NLR: Simple, Cost-Effective, Easily Accessible Indexes for Predicting Prognosis in ICC Patients after Surgery
Source: MDPI journal article supplement (doi:10.3390/jpm12122041), 2022-12-09
Supplement: s1 [file s1]

**Table S1.** The association of demographics and clinicopathologic characteristics with different serum tumor markers.

| Variables                                                            | AFP                    |                         |         | CA19-9                   |                         |         | CEA                     |                          |         | PIVKA-II                |                          |         |
|----------------------------------------------------------------------|------------------------|-------------------------|---------|--------------------------|-------------------------|---------|-------------------------|--------------------------|---------|-------------------------|--------------------------|---------|
|                                                                      | Positive               | Negative                | p-Value | Positive                 | Negative                | p-Value | Positive                | Negative                 | p-Value | Positive                | Negative                 | p-Value |
|                                                                      | (N = 20)               | (N = 142)               |         | (N = 73)                 | (N = 89)                |         | (N = 36)                | (N = 126)                |         | (N = 33)                | (N = 129)                |         |
| Age (y, Mean $\pm$ SD)                                               | 54.9 $\pm$ 12.0        | 56.9 $\pm$ 9.4          | 0.391   | 58.0 $\pm$ 8.4           | 55.5 $\pm$ 10.6         | 0.098   | 58.8 $\pm$ 7.7          | 56.0 $\pm$ 10.2          | 0.125   | 55.0 $\pm$ 10.4         | 57.0 $\pm$ 9.6           | 0.291   |
| Gender(%male)                                                        | 19(95.0%)              | 81 (57.0%)              | 0.001 * | 46(63.0%)                | 54(60.7%)               | 0.761   | 20 (55.6%)              | 80(63.5%)                | 0.388   | 25(75.8%)               | 75(58.1%)                | 0.063   |
| Platelet count (x109/L)                                              | 232.8 $\pm$ 76.7       | 246.6 $\pm$ 84.2        | 0.486   | 236.9 $\pm$ 81.9         | 251.5 $\pm$ 84.1        | 0.265   | 243.7 $\pm$ 72.1        | 245.3 $\pm$ 86.4         | 0.914   | 249.1 $\pm$ 112.9       | 243.8 $\pm$ 74.2         | 0.746   |
| Albumin (mg/dL)                                                      | 42.5 $\pm$ 3.6         | 43.7 $\pm$ 3.7          | 0.156   | 43.0 $\pm$ 3.6           | 44.1 $\pm$ 3.6          | 0.050 * | 43.2 $\pm$ 3.5          | 43.7 $\pm$ 3.7           | 0.529   | 44.4 $\pm$ 3.8          | 43.4 $\pm$ 3.6           | 0.138   |
| Alanine aminotransferase (U/L)                                       | 33.9 $\pm$ 20.9        | 35.6 $\pm$ 35.1         | 0.829   | 37.7 $\pm$ 26.4          | 33.6 $\pm$ 38.4         | 0.443   | 41.3 $\pm$ 27.7         | 33.8 $\pm$ 35.0          | 0.236   | 37.3 $\pm$ 25.3         | 34.9 $\pm$ 35.5          | 0.717   |
| Aspartate aminotransferase (U/L)                                     | 32.1 $\pm$ 12.7        | 32.7 $\pm$ 28.7         | 0.918   | 33.6 $\pm$ 20.9          | 31.8 $\pm$ 31.6         | 0.681   | 36.3 $\pm$ 24.6         | 31.6 $\pm$ 28.0          | 0.360   | 32.8 $\pm$ 24.2         | 32.6 $\pm$ 28.0          | 0.964   |
| Total bilirubin (umol/L)                                             | 14.5 $\pm$ 6.2         | 13.8 $\pm$ 21.1         | 0.890   | 16.1 $\pm$ 29.2          | 12.1 $\pm$ 4.3          | 0.255   | 20.0 $\pm$ 41.1         | 12.2 $\pm$ 4.8           | 0.036 * | 14.0 $\pm$ 8.7          | 14.4 $\pm$ 21.5          | 0.888   |
| Prothrombin time (s)                                                 | 12.0 $\pm$ 0.9         | 12.0 $\pm$ 5.2          | 1.000   | 11.7 $\pm$ 1.2           | 12.3 $\pm$ 6.5          | 0.431   | 11.8 $\pm$ 1.2          | 12.1 $\pm$ 5.5           | 0.756   | 11.9 $\pm$ 1.0          | 12.1 $\pm$ 4.8           | 0.788   |
| Hepatis B surface antigen positive (%)                               | 15(75.0%)              | 70(49.3%)               | 0.031 * | 35(47.9%)                | 50(56.2%)               | 0.296   | 17(47.2%)               | 68(54.0%)                | 0.475   | 22(66.7%)               | 63 (48.8%)               | 0.067   |
| Child-Pugh classifications (A/B/C, %)                                | 20(100.0%)/<br>0(0%)   | 140(98.6%)/<br>2(1.4%)  | 0.593   | 71(97.3%)/<br>2(2.7%)    | 89(100.0%)/<br>0(0%)    | 0.116   | 35(97.2%)/<br>1(2.8%)   | 125(99.2%)/<br>1(0.8%)   | 0.342   | 33(100.0%)/<br>0(0%)    | 127(98.4%)/<br>2(1.6%)   | 0.472   |
|                                                                      | 0(0%)                  | 0(0%)                   |         | 0(0%)                    | 0(0%)                   |         | 0(0%)                   | 0(0%)                    |         | 0(0%)                   | 0(0%)                    |         |
| Barcelona Clinic Liver Cancer staging (A/B/C, %)                     | 14(70.0%)/<br>4(20.0%) | 86(60.6%)/<br>16(11.3%) | 0.168   | 40(54.8%)/<br>6(8.2%)    | 60(67.4%)/<br>14(15.7%) | 0.010 * | 15(41.7%)/<br>5(13.9%)  | 85(67.5%)/<br>15 (11.9%) | 0.010*  | 19(57.6%)/<br>10(30.3%) | 81(62.8%)/<br>10(7.8%)   | 0.001 * |
|                                                                      | 2 (10.0%)              | 40(28.2%)               |         | 27(37.0%)                | 15(16.9%)               |         | 16(44.4%)               | 26(20.6%)                |         | 4(12.1%)                | 38(29.5%)                |         |
| AJCC TNM staging system (I/II/III/IV, %)                             | 8 (40.0%)/<br>7(35.0%) | 74(52.1%)/<br>34(23.9%) | 0.659   | 31(42.5%)/<br>16 (21.9%) | 51(57.3%)/<br>25(28.1%) | 0.021 * | 10(27.8%)/<br>12(33.3%) | 72(57.1%)/<br>29(23.0%)  | 0.017 * | 13(39.4%)/<br>16(48.5%) | 69(53.5%)/<br>25(19.4%)  | 0.004 * |
|                                                                      | 3(15.0%)               | 24(16.9%)               |         | 18(24.7%)                | 9(10.1%)                |         | 10(27.8%)               | 17(13.5%)                |         | 4(12.1%)                | 23(17.8%)                |         |
|                                                                      | 2(10.0%)               | 10(7.0%)                |         | 8(11.0%)                 | 4 (4.5%)                |         | 4(11.1%)                | 8(6.3%)                  |         | 0(0%)                   | 12(9.3%)                 |         |
| Tumor differentiations (unknown/well/moderate/moderate-poor/poor, %) | 1(5.0%)/<br>0(0%)      | 10(7.0%)/<br>1(0.7%)    | 0.673   | 7(9.6%)/<br>1(1.4%)      | 4(4.5%)/<br>0(0%)       | 0.507   | 4(11.1%)/<br>0(0%)      | 7(5.6%)/<br>1(0.8%)      | 0.833   | 1(3.0%)/<br>0(0%)       | 10(7.8%)/<br>1(0.8%)     | 0.065   |
|                                                                      | 0(0%)                  | 1(0.7%)                 |         | 1(1.4%)                  | 0(0%)                   |         | 0(0%)                   | 1(0.8%)                  |         | 0(0%)                   | 1 (0.8%)                 |         |
|                                                                      | 0(0%)                  | 1(0.7%)                 |         | 1(1.4%)                  | 0(0%)                   |         | 0(0%)                   | 1(0.8%)                  |         | 0(0%)                   | 1 (0.8%)                 |         |
|                                                                      | 5(25.0%)/<br>9(45.0%)  | 40(28.2%)/<br>74(52.1%) |         | 20(27.4%)/<br>35(47.9%)  | 25(28.1%)/<br>48(53.9%) |         | 9(25.0%)/<br>19(52.8%)  | 36(28.6%)/<br>64(50.8%)  |         | 5(15.2%)/<br>18(54.5%)  | 40 (31.0%)/<br>65(50.4%) |         |

|                                                |  |             |             |       |             |             |         |             |             |         |             |             |         |
|------------------------------------------------|--|-------------|-------------|-------|-------------|-------------|---------|-------------|-------------|---------|-------------|-------------|---------|
|                                                |  | 5(25.0%)    | 16(11.3%)   |       | 9(12.3%)    | 12(13.5%)   |         | 4(11.1%)    | 17(13.5%)   |         | 9(27.3%)/   | 12(9.3%)/   |         |
| <b>Tumor numbers</b>                           |  | 12(60.0%)/  | 96(67.6%)/  | 0.499 | 49(67.1%)/  | 59(66.3%)/  | 0.911   | 19(52.8%)/  | 89(70.6%)/  | 0.045 * | 16 (48.5%)/ | 92 (71.3%)/ | 0.013 * |
| <b>(single/multiple, %)</b>                    |  | 8(40.0%)    | 46(32.4%)   |       | 24(32.9%)   | 30(33.7%)   |         | 17(47.2%)   | 37(29.4%)   |         | 17 (51.5%)  | 37(28.7%)   |         |
| <b>Main tumor size (cm)</b>                    |  | 6.6 ± 3.7   | 5.7 ± 2.5   | 0.148 | 5.7 ± 2.3   | 6.0 ± 3.0   | 0.357   | 6.0 ± 2.8   | 5.7 ± 2.7   | 0.662   | 5.7 ± 3.5   | 5.8 ± 2.5   | 0.793   |
| <b>Main tumor size (≤5.0 cm/&gt;5.0 cm, %)</b> |  | 8(40.0%)/   | 67(47.2%)/  | 0.546 | 33(45.2%)/  | 42(47.2%)/  | 0.801   | 15(41.7%)/  | 60(47.6%)/  | 0.528   | 19(57.6%)/  | 56(43.4%)/  | 0.145   |
| <b>Presence vascular invasion (%)</b>          |  | 12(60.0%)   | 75(52.8%)   |       | 40(54.8%)   | 47(52.8%)   |         | 21(58.3%)   | 66(52.4%)   |         | 14(42.4%)   | 73(56.6%)   |         |
|                                                |  | 2(10.0%)    | 31(21.8%)   | 0.219 | 19(26.0%)   | 14(15.7%)   | 0.105   | 12(33.3%)   | 21(16.7%)   | 0.029*  | 7(21.2%)    | 26(20.2%)   | 0.893   |
| <b>Microvascular invasion (%)</b>              |  | 5(26.3%)    | 38(27.0%)   | 0.953 | 19(26.4%)   | 24(27.3%)   | 0.900   | 14(40.0%)   | 29(23.2%)   | 0.048 * | 10(31.3%)   | 33(25.8%)   | 0.533   |
| <b>Nerve tract invasion (%)</b>                |  | 1(5.3%)     | 29(20.6%)   | 0.109 | 16(22.2%)   | 14(15.9%)   | 0.309   | 11(31.4%)   | 19(15.2%)   | 0.030 * | 5(15.6%)    | 25(19.5%)   | 0.613   |
| <b>Presence lymph node metastasis (±, %)</b>   |  | 1(5.0%)     | 26(18.3%)   | 0.135 | 17 (23.3%)  | 10 (11.2%)  | 0.041 * | 9(25.0%)    | 18(14.3%)   | 0.128   | 2(6.1%)     | 25(19.4%)   | 0.067   |
| <b>Presence distant metastasis (±, %)</b>      |  | 1(5.0%)     | 8(5.6%)     | 0.908 | 6(8.2%)     | 3(3.4%)     | 0.180   | 4(11.1%)    | 5(4.0%)     | 0.099   | 0 (0%)      | 9(7.0%)     | 0.118   |
| <b>Overall survival (months)</b>               |  | 19.8 ± 13.2 | 20.8 ± 12.4 | 0.744 | 18.8 ± 13.0 | 22.2 ± 11.9 | 0.084   | 15.6 ± 11.3 | 22.2 ± 12.4 | 0.005 * | 22.2 ± 10.9 | 20.3 ± 12.8 | 0.453   |
| <b>Recurrence-free survival (months)</b>       |  | 11.9 ± 12.4 | 15.0 ± 12.4 | 0.296 | 12.7 ± 12.4 | 16.2 ± 12.3 | 0.078   | 10.9 ± 11.2 | 15.7 ± 12.6 | 0.040 * | 15.7 ± 11.2 | 14.3 ± 12.8 | 0.578   |
| <b>Recurrence</b>                              |  | 14(70.0%)   | 80 (56.3%)  | 0.246 | 48 (65.8%)  | 46(51.7%)   | 0.071   | 28 (77.8%)  | 66(52.4%)   | 0.006 * | 18(54.5%)   | 76(58.9%)   | 0.650   |
| <b>Intrahepatic tumor recurrence</b>           |  | 7(35.0%)    | 52(36.6%)   | 0.888 | 28(38.4%)   | 31(34.8%)   | 0.643   | 13(36.1%)   | 46 (36.5%)  | 0.965   | 11(33.3%)   | 48(37.2%)   | 0.680   |
| <b>lymph node metastasis</b>                   |  | 1(5.0%)     | 8(5.6%)     | 0.908 | 2(2.7%)     | 7 (7.9%)    | 0.156   | 3(8.3%)     | 6(4.8%)     | 0.409   | 1(3.0%)     | 8(6.2%)     | 0.478   |
| <b>distant metastasis</b>                      |  | 2(10.0%)    | 13(9.2%)    | 0.903 | 10(13.7%)   | 5(5.6%)     | 0.077   | 6(16.7%)    | 9(7.1%)     | 0.082   | 3(9.1%)     | 12 (9.3%)   | 0.970   |

Notes: \* p < 0.05.

**Table S2.** The association of demographics and clinicopathologic characteristics with different HALP score, PLR, and NLR.

| Variables                                                                      | HALP ≥ 43.63<br>(N = 100)                                               | HALP < 43.63<br>(N = 62)                                                 | p-Value  | PLR ≥ 76.51<br>(N = 147)                                                 | PLR < 76.51<br>(N = 15)                                            | p-Value  | NLR ≥ 3.73<br>(N = 28)                                               | NLR < 3.73<br>(N = 134)                                                    | p-Value |
|--------------------------------------------------------------------------------|-------------------------------------------------------------------------|--------------------------------------------------------------------------|----------|--------------------------------------------------------------------------|--------------------------------------------------------------------|----------|----------------------------------------------------------------------|----------------------------------------------------------------------------|---------|
| Age (y, Mean ± SD)                                                             | 56.6 ± 9.5                                                              | 56.6 ± 10.2                                                              | 0.993    | 56.3 ± 10.0                                                              | 59.8 ± 6.5                                                         | 0.183    | 54.8 ± 9.8                                                           | 57.0 ± 9.7                                                                 | 0.270   |
| Gender(%male)                                                                  | 68(68.0%)                                                               | 32 (51.6%)                                                               | 0.037 *  | 88(59.9%)                                                                | 12(80.0%)                                                          | 0.126    | 18(64.3%)                                                            | 82 (61.2%)                                                                 | 0.760   |
| Platelet count (x10 <sup>9</sup> /L)                                           | 219.5 ± 61.9                                                            | 285.9 ± 96.3                                                             | <0.001 * | 252.3 ± 81.2                                                             | 172.9 ± 68.4                                                       | <0.001 * | 241.0 ± 98.7                                                         | 245.7 ± 80.0                                                               | 0.787   |
| Albumin (mg/dL)                                                                | 44.3 ± 3.2                                                              | 42.4 ± 4.1                                                               | 0.002    | 43.6 ± 3.6                                                               | 43.2 ± 4.4                                                         | 0.675    | 41.7 ± 4.9                                                           | 44.0 ± 3.2                                                                 | 0.029 * |
| Alanine aminotransferase (U/L)                                                 | 35.9 ± 26.0                                                             | 34.6 ± 43.3                                                              | 0.806    | 34.0 ± 33.6                                                              | 49.4 ± 31.7                                                        | 0.091    | 32.5 ± 23.7                                                          | 36.0 ± 35.4                                                                | 0.618   |
| Aspartate aminotransferase (U/L)                                               | 30.8 ± 18.2                                                             | 35.6 ± 37.5                                                              | 0.282    | 32.1 ± 27.9                                                              | 37.9 ± 19.1                                                        | 0.431    | 34.9 ± 24.7                                                          | 32.2 ± 27.8                                                                | 0.629   |
| Total bilirubin (umol/L)                                                       | 13.1 ± 5.7                                                              | 15.2 ± 31.5                                                              | 0.503    | 14.0 ± 20.8                                                              | 13.1 ± 4.8                                                         | 0.874    | 21.6 ± 46.1                                                          | 12.3 ± 5.7                                                                 | 0.024 * |
| Prothrombin time (s)                                                           | 12.3 ± 6.2                                                              | 11.7 ± 1.1                                                               | 0.466    | 12.0 ± 5.1                                                               | 12.0 ± 1.5                                                         | 0.964    | 12.3 ± 1.5                                                           | 12.0 ± 5.3                                                                 | 0.737   |
| Hepatis B surface antigen positive (%)                                         | 54(54.0%)                                                               | 31(50.0%)                                                                | 0.620    | 72(49.0%)                                                                | 13(86.7%)                                                          | 0.005 *  | 13(46.4%)                                                            | 64(47.8%)                                                                  | 0.898   |
| Child-Pugh classifications (A/B/C, %)                                          | 100(100.0%)/<br>0(0%)/<br>0(0%)                                         | 60(96.8%)/<br>2(3.2%)/<br>0(0%)                                          | 0.071    | 145(98.6%)/<br>2(1.4%)/<br>0(0%)                                         | 15(100.0%)/<br>0(0%)/<br>0(0%)                                     | 0.649    | 27(96.4%)/<br>1(3.6%)/<br>0(0%)                                      | 133(99.3%)/<br>1(0.7%)/<br>0(0%)                                           | 0.218   |
| Barcelona Clinic Liver Cancer staging (A/B/C, %)                               | 62(62.0%)/<br>16(16.0%)/<br>22(22.0%)                                   | 38(61.3%)/<br>4(6.5%)/<br>20 (32.3%)                                     | 0.112    | 88(59.9%)/<br>17(11.6%)/<br>42(28.6%)                                    | 12(80.0%)/<br>3(20.0%)/<br>0(0%)                                   | 0.051    | 12(42.9%)/<br>3(10.7%)/<br>13(46.4%)                                 | 88(65.7%)/<br>17(12.7%)/<br>29(21.6%)                                      | 0.023 * |
| AJCC TNM staging system (I/II/III/IV, %)                                       | 52(52.0%)/<br>27(27.0%)/<br>15(15.0%)/<br>6(6.0%)                       | 30(48.4%)/<br>14 (22.6%)/<br>12(19.4%)/<br>6 (9.7%)                      | 0.676    | 75(51.0%)/<br>34(23.1%)/<br>27(18.4%)/<br>11 (7.5%)                      | 7(46.7%)/<br>7(46.7%)/<br>0(0%)/<br>1 (6.7%)                       | 0.122    | 9(32.1%)/<br>6(21.4%)/<br>8 (28.6%)/<br>5(17.9%)                     | 73(54.5%)/<br>35(26.1%)/<br>19(14.2%)/<br>7(5.2%)                          | 0.016 * |
| Tumor differentiations (unknown/well/moderate/moderate/moderate- poor/poor, %) | 6(6.0%)/<br>0(0%)/<br>1(1.0%)/<br>31(31.0%)/<br>51(51.0%)/<br>11(11.0%) | 5(8.1%)/<br>1(1.6%)/<br>0(0%)/<br>14(22.6%)/<br>32(51.6%)/<br>10 (16.1%) | 0.517    | 11(7.5%)/<br>1(0.7%)/<br>0(0%)/<br>42(28.6%)/<br>75(51.0%)/<br>18(12.2%) | 0(0%)/<br>0(0%)/<br>1(6.7%)/<br>3(20.0%)/<br>8(53.3%)/<br>3(20.0%) | 0.034 *  | 3(10.7%)/<br>0(0%)/<br>0(0%)/<br>7(25.0%)/<br>15(53.6%)/<br>3(10.7%) | 8(6.0%)/<br>1(0.7%)/<br>1 (0.7%)/<br>38(28.4%)/<br>68(50.7%)/<br>18(13.4%) | 0.919   |
| Tumor numbers (single/multiple, %)                                             | 62(62.0%)/<br>38(38.0%)                                                 | 46(74.2%)/<br>16(25.8%)                                                  | 0.110    | 99(67.3%)/<br>48(32.7%)                                                  | 9(60.0%)/<br>6(40.0%)                                              | 0.565    | 18(64.3%)/<br>10(35.7%)                                              | 90(67.2%)/<br>44(32.8%)                                                    | 0.769   |

|                                                    |             |             |         |             |             |         |             |             |          |
|----------------------------------------------------|-------------|-------------|---------|-------------|-------------|---------|-------------|-------------|----------|
| <b>Main tumor size (cm)</b>                        | 5.4 ± 2.5   | 6.4 ± 2.9   | 0.014 * | 6.0 ± 2.7   | 4.1 ± 1.7   | 0.011 * | 7.0 ± 2.8   | 5.5 ± 2.6   | 0.008 *  |
| <b>Main tumor size ( ≤ 5.0 cm/ &gt; 5.0 cm, %)</b> | 51(51.0%)/  | 24(38.7%)/  | 0.127   | 65(44.2%)/  | 10(66.7%)/  | 0.097   | 7(25.0%)/   | 68(50.7%)/  | 0.013 *  |
|                                                    | 49(49.0%)   | 38(61.3%)   |         | 82(55.8%)   | 5(33.3%)    |         | 21(75.0%)   | 66(49.3%)   |          |
| <b>Presence vascular invasion (%)</b>              | 19(19.0%)   | 14(22.6%)   | 0.582   | 32(21.8%)   | 1(6.7%)     | 0.167   | 8(28.6%)    | 25(18.7%)   | 0.236    |
| <b>Microvascular invasion (%)</b>                  | 29(29.0%)   | 14(23.3%)   | 0.434   | 37(25.5%)   | 6(40.0%)    | 0.228   | 5(19.2%)    | 38(28.4%)   | 0.337    |
| <b>Nerve tract invasion (%)</b>                    | 14(14.0%)   | 16(26.7%)   | 0.047*  | 29 (20.0%)  | 1 (6.7%)    | 0.208   | 5(18.5%)    | 25(18.8%)   | 0.973    |
| <b>Presence lymph node metastasis (±, %)</b>       | 14(14.0%)   | 13(21.0%)   | 0.247   | 27 (18.4%)  | 0(0%)       | 0.069   | 9(32.1%)    | 18(13.4%)   | 0.016 *  |
| <b>Presence distant metastasis (±, %)</b>          | 4(4.0%)     | 5(8.1%)     | 0.272   | 9(6.1%)     | 0(0%)       | 0.324   | 2(7.1%)     | 7(5.2%)     | 0.687    |
| <b>Overall survival (months)</b>                   | 20.2 ± 11.6 | 21.5 ± 13.7 | 0.497   | 20.5 ± 12.4 | 23.0 ± 13.0 | 0.453   | 16.5 ± 10.6 | 21.6 ± 12.6 | 0.048 *  |
| <b>Recurrence-free survival (months)</b>           | 13.4 ± 10.8 | 16.6 ± 14.6 | 0.140   | 14.3 ± 12.4 | 18.2 ± 13.0 | 0.248   | 7.8 ± 7.0   | 16.0 ± 12.9 | <0.001 * |
| <b>Progression</b>                                 | 63(63.0%)   | 31(50.0%)   | 0.103   | 89(60.5%)   | 5(33.3%)    | 0.042 * | 22 (78.6%)  | 72(53.7%)   | 0.015 *  |
| <b>Intrahepatic tumor recurrence</b>               | 43(43.0%)   | 16 (25.8%)  | 0.027 * | 54(36.7%)   | 5 (33.3%)   | 0.794   | 12(42.9%)   | 47(35.1%)   | 0.436    |
| <b>lymph node metastasis</b>                       | 4(4.0%)     | 5(8.1%)     | 0.272   | 8(5.4%)     | 1 (6.7%)    | 0.844   | 5(17.9%)    | 4(3.0%)     | 0.002 *  |
| <b>distant metastasis</b>                          | 8(8.0%)     | 7(11.3%)    | 0.483   | 14(9.5%)    | 1 (6.7%)    | 0.716   | 4 (14.3%)   | 11(8.2%)    | 0.313    |
